# Supplementary material
Source: publisher figshare collection journal article supplement (https://acs.figshare.com/ndownloader/files/4688614)
Supplement: Supplementary file 1 [file 4688614]

## ELECTRONIC SUPPLEMENTARY DATA

For

A 3D Homometallic Carboxylate Ferrimagnet Constructed from a  
Manganese(II) Succinate Carboxylate Layer Motif Pillared by  
Isonicotinate Spacers

Ming-Hua Zeng,<sup>\*,†</sup> Mei-Chun Wu,<sup>†</sup> Hong Liang,<sup>\*,†</sup> Yan-Ling Zhou,<sup>†</sup>  
Xiao-Ming Chen,<sup>‡</sup> Seik-Weng Ng<sup>§</sup>

<sup>†</sup>Department of Chemistry and Chemical Engineering, GuangXi Normal University,  
Guilin 541004, P. R. China Fax: Int. code +86 773 5812-383. E-mail:  
zmh@mailbox.gxnu.edu.cn.

### Experimental Section

Succinic acid (0.118 g, 1 mmol) in an aqueous solution (6 mL) of NaOH (0.080 g, 2 mmol) was mixed with isonicotinic acid (0.123 g, 1 mmol) in water (2 mL), which was then added to an aqueous solution (2 mL) of MnCl<sub>2</sub>·4H<sub>2</sub>O (0.197 g, 1 mmol). The mixture was placed in a 23 mL Teflon-lined autoclave and heated at 130°C for 96 hrs. The autoclave was cooled over a period of 12 hrs at a rate of 5 °C h<sup>-1</sup>, and **1** as pale-yellow crystals were collected by filtration, washed with water, and dried in air, the final pH of the solution is *ca.* 5.5. The phase pure **1** was obtained by manual separation (yield: 102 mg, *ca.* 30% based on Mn). Anal. Calcd. (%) for C<sub>20</sub>H<sub>16</sub>Mn<sub>3</sub>N<sub>2</sub>O<sub>12</sub>: C, 37.47; H, 2.52; N, 4.37; found C, 37.40; H, 2.56; N, 4.33%. IR data: 1597<sub>vs</sub>, 1551<sub>s</sub>, 1387<sub>vs</sub>, 1288<sub>m</sub>, 1206<sub>m</sub>, 869<sub>w</sub>, 770<sub>m</sub>, 697<sub>m</sub>, 515<sub>w</sub>, 434<sub>w</sub>.

The single crystal diffraction data were measured with a Bruker Smart Apex CCD system. The structure was solved by direct methods and refined using full-matrix least-squares technique using SHELXTL. All non-hydrogen atoms were refined with anisotropic displacement parameters, while the hydrogen atoms of the ligands were refined as riding atoms. Crystallographic data for **1**: C<sub>20</sub>H<sub>16</sub>Mn<sub>3</sub>N<sub>2</sub>O<sub>12</sub>, *M<sub>r</sub>* = 641.17, triclinic, space group *P*-1, *a* = 7.649(3), *b* = 8.916(3), *c* = 9.472(3) Å, *V* = 554.0(3) Å<sup>3</sup>, *α* = 68.858(5)°, *β* = 85.627(5)°, *γ* = 67.227(5)°, *Z* = 1, *T* = 293(2) K, *D<sub>c</sub>* = 1.922 Mg m<sup>-3</sup>, (Mo-Kα) = 1.74 mm<sup>-1</sup>, *F*(000) = 321. Final *R*<sub>1</sub> and *wR*<sub>2</sub> (all data) = 0.0241 and 0.0563, and *S* = 1.10.

Magnetic measurements: magnetic susceptibility measurements of **1** were performed on a polycrystalline sample on a Quantum Design MPMS-XL7 SQUID. Data were corrected for the diamagnetic contribution calculated from Pascal constants and the diamagnetism of the sample and sample holder were taken into account.

**Scheme S1.** The Bridging Mode for  $\mu\text{-RCOO}^-$  and  $\mu\text{-N}_3^-$

|             |                |                 |                  |             |  |             |
|-------------|----------------|-----------------|------------------|-------------|--|-------------|
|             |                |                 |                  |             |  |             |
|             |                |                 |                  |             |  |             |
| <b>2.20</b> | <i>syn-syn</i> | <i>syn-anti</i> | <i>anti-anti</i> | <b>3.21</b> |  | <b>4.22</b> |
| <b>2.11</b> |                |                 |                  |             |  |             |

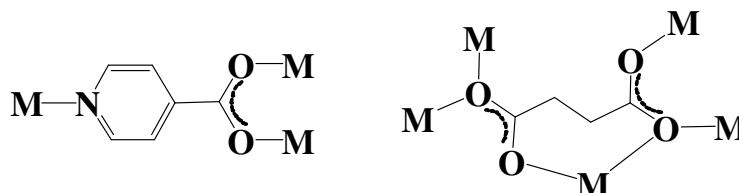

**Scheme S2.** Coordination modes of suc and ina ligands in **1**.

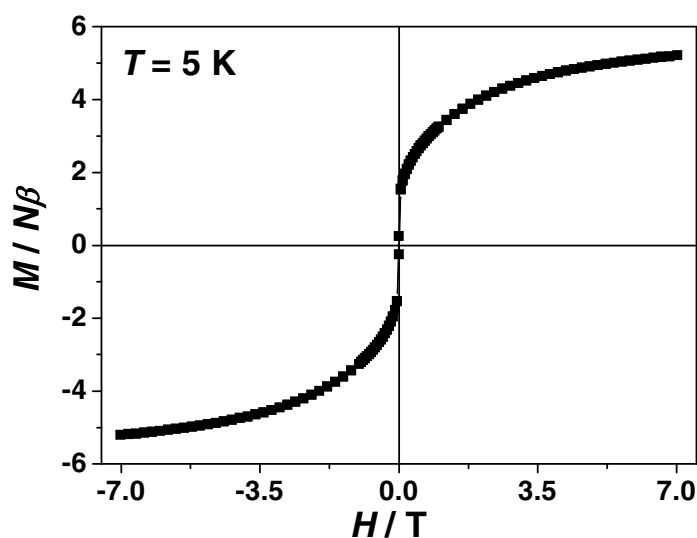

**Figure S1a.** Magnetization plot at 5 K for compound **1** in the  $\pm 7$  T range (per three  $\text{Mn}^{\text{II}}$  ions).

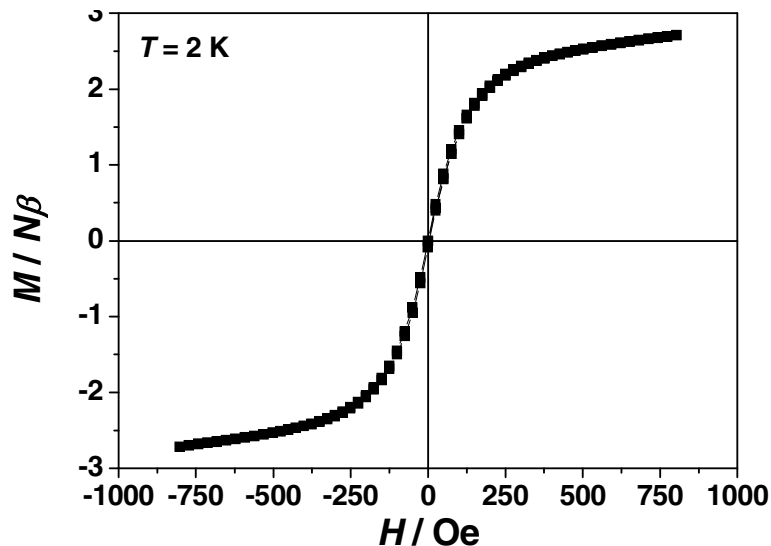

**Figure S1b.** Magnetization plot at 2 K for compound **1** in the  $\pm 800$  G range (per three  $\text{Mn}^{\text{II}}$  ions).

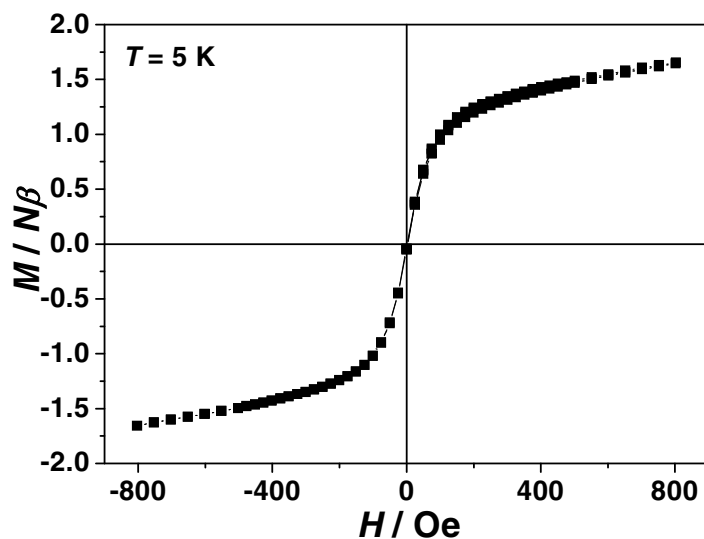

**Figure S1c.** Magnetization plot at 5 K for compound **1** in the  $\pm 800$  G range (per three  $\text{Mn}^{\text{II}}$  ions).

Least-square fitting of the magnetic data for **1**:

Given the spin value a convenient expression may be deduced from a classical spin model, using the spin Hamiltonian where  $J_1$  and  $J_2$  stand for the exchange interactions and where the  $S_n$  are classical spin vectors. This approximation is fully justifiable when studying manganese(II) chains that exhibit large spins ( $S = 5/2$ ). The wave-vector-dependent susceptibility is

$$H = -J_1 \sum (S_{3i} S_{3i+1} + S_{3i+1} S_{3i+2}) - J_2 \sum S_{3i-1} S_{3i}$$

For the alternating chain, the pair correlation function must be written as

$$\langle S_n S_{n+p} \rangle = u_1 u_1 u_2 u_1 \dots$$

with

$$u_1 = \coth\left(\frac{J_1}{kT}\right) - \frac{kT}{J_1} \quad u_2 = \coth\left(\frac{J_2}{kT}\right) - \frac{kT}{J_2} \quad C = Ng^2 \mu_B^2 / (3kT)$$

Taking into account the  $p$  parity, the above expression reduces

To

$$S(q) = 1/kT \{ 3(1 - u_1^4 u_2^2) + 2(2u_1 + u_2 - u_1^3 u_2(u_1 + 2u_2)) \cos(qa) + 2(u_1^2 + 2u_1 u_2 - 2u_1^3 u_2 - u_1^2 u_2^2) \cos(2qa) \} \{ 1 - 2u_1^2 u_2 \cos(3qa) + u_1^4 u_2^2 \}^{-1}$$

Then we obtain the expression of the bulk susceptibility, corresponding to the  $q = 0$  limit, for the alternating chain  $J_1 J_1 J_2 \dots$  as which reduces to the uniform chain solved by Fisher<sup>11</sup> for  $u_1 = u_2$  ( $C$  takes the usual meaning  $C = Ng^2 \mu_B^2 / (3kT)$ ).

$$\chi = \frac{C}{(1 - u_1^2 u_2)^2} \{ 3(1 - u_1^4 u_2^2) + 4u_1(1 - u_1^2 u_2^2) + 2u_2(1 + u_1)^2(1 - u_1)^2 + 2u_1^2(1 - u_2^2) \}$$

$$J_i \rightarrow J_i S(S+1) \quad g \rightarrow g(S(S+1))^{1/2} \quad (\text{Equation S1})$$

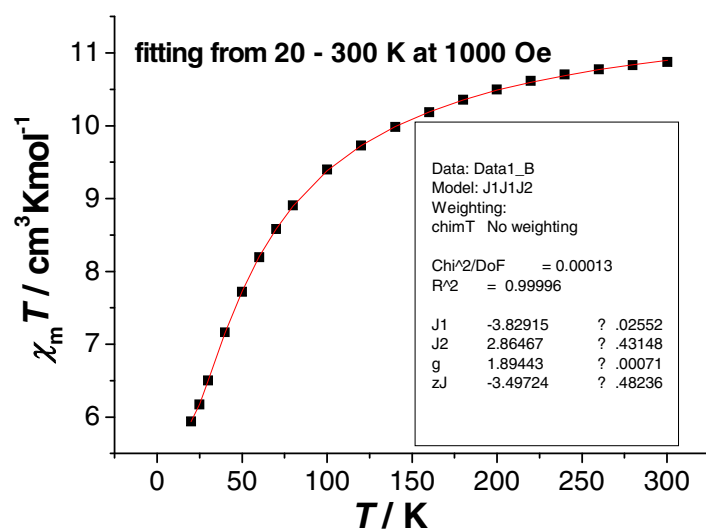

**Figure S2.** Plot of  $\chi_M T$  vs.  $T$ . Solid line represents the best fit with the parameters given in the text.

(11) Fisher, M, E. *Am. J. Phys.* **1974**, 32, 241.

(12) Abu-Youssef, M. A. M.; Drillon, M.; Escuer, A.; Goher, M. A. S.; Mautner, F. A.; Vicente, R. *Inorg. Chem.* **2000**, 39, 5022.

Adjusting the so calculated values of  $\chi_M(T)$  to the measured susceptibility  $\chi_M^{\text{exp}}(T)$  data (20 ~ 300 K), and obtain the parameters:  $g = 1.89$ ,  $J_1 = - 3.83 \text{ cm}^{-1}$ ,  $J_2 = 2.86 \text{ cm}^{-1}$ , and  $zJ = - 3.49 \text{ cm}^{-1}$  (Where,  $J_1, J_2$  is the intra-trimer exchange interaction,  $J$  is the inter-chains exchange interaction and  $z$  is the number of nearest neighbors of the chains.), and  $R$  is residual factor defaulted as  $R = \Sigma(\chi_{\text{obs}} T - \chi_{\text{cal}} T)^2 / \Sigma(\chi_{\text{obs}} T)^2$ .
